# Supplementary material for: Drinks and Food Caffeine Consumption and Factors Associated With Higher Intakes. A Cohort Study In Pregnant Women
Source: Preprints.org preprint supplement (doi:10.20944/preprints202104.0527.v1), 2021-04-20
Supplement: Supplementary file 1 [file supplementary]

Supplementary Table S1. Transformation of mg of caffeine.

| <b>Drinks/food</b>              | <b>Volume</b>  | <b>Mg caffeine</b> |
|---------------------------------|----------------|--------------------|
| <b>Coffee*</b>                  | 1 cup 150 ml   | 100mg              |
| <b>Decaffeinated coffee*</b>    | 1 cup 150 ml   | 2mg                |
| <b>Tea*</b>                     | 1 cup 150ml    | 39mg               |
| <b>Coke*</b>                    | 1 bottle 200ml | 20mg               |
| <b>Energetic drinks‡</b>        | 1 bottle 200ml | 64mg               |
| <b>Chocolate without milk**</b> | 1 square 28g   | 23mg               |
| <b>Chocolate with milk**</b>    | 1 square 28g   | 6mg                |

Adapted from: \*Li et al., 2015; \*\*Cnattingius *et al.*, 2000; ‡ <http://energydrink-es.redbull.com/cafeina-en-red-bull>
